# Supplementary material for: Four dimensional variational inversion of black carbon emissions during ARACTAS-CARB with WRFDA-Chem
Source: Copernicus journal article supplement (doi:10.5194/acp-2016-573), 2016-10-17
Supplement: Supplementary file [file acp-2016-573-AC1-supplement.pdf]

1 We thank the referees for their reviews, which were instrumental in making a much  
2 improved manuscript. In response, we have made changes where we felt they were warranted,  
3 and gave replies to all comments. In this response, all of the page and line numbers for  
4 corrections refer to the revised manuscript, while we keep page and line numbers intact from  
5 the original reviews. The manuscript diff document is consistent with the changes described  
6 below.

## 7 1 Responses to Anonymous Referee #1

8 1. *MAJOR COMMENT: Level of Detail: Extensive details associated with the mathemat-*  
9 *ical relationships associated with four dimensional data assimilation will likely reduce*  
10 *the overall target audience. While the air quality community is interested in methods*  
11 *to improve emission estimates, I would expect that much of those details will not be*  
12 *of much interest to the same community. More importantly, it was not clear whether*  
13 *the details on the adjoint are the same as those presented previously in the literature*  
14 *or whether they are new. If the relationships are typical of those of previous adjoint*  
15 *papers, perhaps more of the details could be put into the appendix. The authors should*  
16 *more clearly differentiate what is new and what is not new.*

17 **AUTHOR RESPONSE:** We have reorganized the Introduction and Section 2.3  
18 extensively and added clarifying introductions and transitions to guide the general  
19 audience. Although we still retain significant mathematical details, these are limited  
20 to those necessary for understanding how this approach is different than previous ones,  
21 how the results are obtained, and what those results mean. The unique challenge of the  
22 theoretical portion of this work was in applying an additive preconditioned incremental  
23 4D-Var approach to log-normal control variables. Multiplicative incremental 4D-Var  
24 for log-normal control variables was discussed in detail by Fletcher and Jones (2014).

### 25 **Manuscript changes:**

26 The Introduction has been modified to include the following: “The modifications to  
27 that system that are required for this work are described in Sec. 2 as well as in Guerrette  
28 and Henze (2015) (GH15). These include new linearized model descriptions (GH15),  
29 memory and I/O trajectory management (GH15), a log-normal emission control vari-  
30 able (Sec. 2.3.2), calculation of posterior variance (Sec. 2.3.4), and improvements to  
31 the Gauss-Newton optimization algorithm to handle nonlinearities (Sec. 2.3.5). As  
32 described in GH15, this approach of assimilating chemical tracer observations in a re-  
33 gional numerical weather prediction and chemistry model is unique in the context of  
34 previous 4D-Var flux constraints.”

35 We combined the opening to Section 2.3 with Sections 2.3.1 and 2.3.3 in a more logical  
36 flow. We now start new Section 2.3.1 with incremental 4D-Var instead of the more  
37 fundamental derivation that is well-known from previous literature. p12, line 2: added  
38 a sentence for clarity on posterior covariance; “While areas where uncertainty has been  
39 reduced from the prior include new information from the observations, areas without  
40 uncertainty reduction are simply a new realization of the prior.”

41 Section 2.3.2 is split. One half is merged with the description of lognormal emissions  
42 (new Sec. 2.3.2). The other is separated into its own subsection that deals with Gaus-  
43 sian errors (new Sec. 2.3.3). The subsections are also reorganized and include new  
44 transition sentences to help clarify why we are discussing specific details and also what  
45 is new versus old. Much of the details in section 2.3.5 have now been removed.

- 46 2. *MAJOR COMMENT: As described in a few of my specific comments, the discussion of*  
47 *what type of observations would be desirable to further constrain the adjoint technique*  
48 *and improve the emission estimates. The aircraft flights that targeted the fires were*  
49 *obviously critical, but would other flight paths be more useful? Or would more cases be*  
50 *useful? Were there only two periods during ARCTAS-CARB that were useful, or were*  
51 *the number of cases examined more limited by the computational expense of adjoint*  
52 *techniques?*

53 **AUTHOR RESPONSE:**

54 There were four flights during the California portion of ARCTAS (20, 22, 24, and 26  
55 June). The 20 June flight characterized Northern California anthropogenic sources  
56 before the fires started. The 26 June flight only flew over California for 3 hours,  
57 and then transited to the next base of operations. The 22 and 24 June observations  
58 were across longer durations and influenced significantly by BB sources. There was  
59 no underlying limitation of 4D-Var that prevented using the other flights, but those  
60 observations were limited in terms of the amount of information they contained about  
61 BB sources, which was our primary interest. We added some of these details to the  
62 manuscript.

63 **Manuscript changes:**

64 pp13, line 21: Addition; “The 20 June flight of ARCTAS-CARB characterized Northern  
65 California anthropogenic sources, but was not influenced by fires.”

66 pp13, line 24: Modification; “The 24 June flight passed back and forth in the downwind  
67 region between Los Angeles and San Diego, measuring the outflow from those cities and  
68 the transportation between them, and 1 day old diluted BB outflow from the north.”

- 69 3. *MAJOR COMMENT: The authors acknowledge that other meteorological factors will*  
70 *affect their analysis. They also mention that mostly clear skies were observed over*  
71 *California, so that complex cloud processes (i.e. wet removal) did not occur in this*  
72 *study. Near the end of the paper they mention it would be useful to have even simpler*  
73 *meteorological conditions to reduce uncertainties in meteorology. But it would seem*  
74 *very difficult to find such cases and one would have to confront complex real-world*  
75 *conditions at some point anyway.*

76 **AUTHOR RESPONSE:** Please see response to “Specific Comment” 19

- 77 1. *Specific Comment: Title: ARCTAS is misspelled.*

78 **Manuscript changes:** The title is corrected.

- 79 2. *Specific Comment: Page 1, line 7: Consider changing “multiple” to “three”. The next*  
80 *line lists 3 inventories.*

81 **Manuscript changes:** We changed “multiple” to “three”.

- 82 3. *Specific Comment: Page 1, line 9: Change the use of “×” and through out the text*  
83 *to write out what they actually mean in terms of a change. I find the usage in this*  
84 *particular sentence to be confusing.*

85 **AUTHOR RESPONSE:** We agree that several of the instances of “×” are difficult  
86 to comprehend. We added terminology in both the abstract and the first paragraph  
87 to introduce × to mean “a factor of”, as in a factor of 2 to 3 (×2 to ×3. Anywhere  
88 this exact phrasing does not fit, we have fixed the text. We also rearranged some other  
89 sentences with this vernacular for ease of reading.

90 **Manuscript changes:** The following sentences are modified:

91 ORIGINAL p1,line9: p1, line 9: “On 22 June, aircraft observations are able to reduce  
92 the spread between a customized QFED inventory and FINNv1.0 from a factor of 3.5  
93 (×3.5) to only ×2.1.”

94 p2, line 10: “Zhang et al. (2014a) concluded that diffusion and loss mechanisms  
95 limit the corresponding responses of domain-wide aerosol burden, AOD, and 2 m  
96 temperature to ×2-3.”

97 p2, line 4: “Bond et al. (2013) cite several inventories of annual U.S. non-BB BC  
98 sources, which are between 260 to 440 Gg yr<sup>-1</sup>, yielding a maximum to minimum ratio  
99 of 1.7.”

100 p14, line 33: “...plus the adjoint (×10 longer than the nonlinear model), the cost of  
101 incremental 4D-Var is approximately ×600 more than that of a single forward simula-  
102 tion...”

- 103 4. *Specific Comment: Page 3, lines 25-35: The motivation of why ARTCAS-CARB cam-*  
104 *campaign is used for their analysis should be improved. The way the paragraph is phrased,*  
105 *it basically just says they are going to use this particular campaign. But this could be*  
106 *changed to upfront state that the campaign had aircraft measurements characterizing*  
107 *both anthropogenic and biomass burning sources of BC and therefore would be useful*  
108 *to test their adjoint-based technique.*

109 **Manuscript changes:** We divided this long paragraph into three smaller ones, and  
110 add language to clarify why we used ARCTAS-CARB.

- 111 5. *Specific Comment: Page 4, line 17: Change “also turned off” to something else. Since*  
112 *it is not available, it is not possible to turn off that option. Also large fires could*  
113 *significantly affect meteorology by dramatically reducing incoming shortwave radiation,*  
114 *so some of the uncertainties in the adjoint technique will be due to this process that is*  
115 *neglected — in addition to the other meteorological processes they note.*

116 **Manuscript changes:** p4, line 3: Modification; “Microphysical and radiative re-  
117 sponses to online aerosols are not taken into account for GOCART aerosols in WRF-  
118 Chem.”

- 119 6. *Specific Comment: Page 4,line 32: The grid spacing of 18 km is rather coarse, espe-*  
120 *cially in resolving terrain-induced circulations in California. There have been numerous*

121 *studies on this subject for California, and it would be useful to point that out. Although*  
122 *not explicitly stated here, the choice of coarse grid spacing is likely due to the compu-*  
123 *tation cost of the adjoint-based technique.*

124 **AUTHOR RESPONSE:** We added the following paragraph as this is an impor-  
125 tant consideration for future work. Please see the updated document for appropriate  
126 references.

127 **Manuscript changes:** “Our horizontal grid spacing was chosen to balance the wall-  
128 time and memory requirements of 4D-Var with model accuracy, and the ACM2 PBL  
129 option was chosen to reduce ADM and TLM development efforts. Angevine et al.  
130 (2012) recommend that the complex terrain in California demands fine tuning of the  
131 WRF horizontal grid spacing, PBL, LSM, and reanalysis initialization. Among other  
132 conclusions, those authors found that at six surface sites near the land-ocean boundary  
133 a 4 km and a 12 km simulation with similar settings had mean wind speed biases of (0.15  
134 to 1.5)  $\text{m s}^{-1}$  and (-0.38 to 1.9)  $\text{m s}^{-1}$ , respectively. Supporting that conclusion, Strand  
135 et al. (2012) used a 36 km resolution chemical transport model (CTM), with offline  
136 meteorology, and found significant negative mean fractional bias (MFB) in modeled  
137  $\text{PM}_{2.5}$  relative to surface observations of fires within narrow Northern California valleys  
138 in July 2008 (MFB=-34.95%) and during autumn 2007 Santa Ana winds (MFB=-  
139 110.22%). During the July 2008 episode, their CTM predictions had a smaller positive  
140 bias (MFB=+21.88%). Therefore, we would expect similar wind and concentration  
141 biases at 18 km resolution, which may or may not be improved by online meteorology.  
142 Incremental 4D-Var provides an opportunity to utilize a different model configuration  
143 (e.g., resolution) for the NLM comparisons of model to observations than that used for  
144 the ADM and TLM simulations. The adaptation of that capability from meteorological  
145 (i.e., Zhang et al., 2014b) to chemical simulations and the subsequent testing is reserved  
146 for future WRFDA-Chem developments.”

- 147 7. *Specific Comment: Page 5, line 5: I could be wrong, but I thought the FINN emissions*  
148 *provided emissions per fire (i.e. point) that did not provide a spatial information on*  
149 *the size of the fire.*

150 **AUTHOR RESPONSE:** According to Wiedinmyer et al. (2011), each fire source is  
151 assumed to cover the entire  $1 \text{ km} \times 1 \text{ km}$  MODIS pixel from which the fire detection  
152 was captured. This area ( $1 \text{ km}^2$ ) is assumed equal to the burned area for that day,  
153 which is used to calculate emissions. There is an exception for grassland/savannas,  
154 which has an assumed area of  $0.75 \text{ km}^2$ , and also when the MODIS VCF product  
155 includes non-zero fractional bare cover for a pixel.

- 156 8. *Specific Comment: Page 5, line 13: I am skeptical of scaling the AOD based on a known*  
157 *high bias in GEOS-5. The bias is not necessarily linearly related to emissions. The*  
158 *problem in AOD in GEOS-5 could be a host of issues, such as representing the right*  
159 *mix of scattering and absorbing aerosols, water uptake of aerosols, and the treatment*  
160 *of aerosol optical properties.*

161 **AUTHOR RESPONSE:** We also don't believe that the GEOS-5 AOD scaling should  
162 give perfect emissions. Still, we wanted to compare these inventories following the

163 methodologies proposed by their creators to see if one has an advantage over the  
164 other. Although we made several modifications when inconsistencies arose with either  
165 observations (AOD for QFED) or known environmental behavior (diurnal pattern of  
166 sunlight), we feel that those fixes were not outside the intentions of those developers.  
167 We added the following paragraph to clarify the corrections we made to the inventories.

168 **Manuscript changes:** p5, line 29-32: Addition; “Any inverse modeling study that  
169 depends on the first guess should start in a region of high probability. In a Bayesian  
170 inversion, the first guess should be unbiased on average. Here we address several  
171 known errors in our prior inventories that we either fix or are unable to fix. All  
172 changes are consistent with either observations or the intended physical descriptions  
173 of the inventories.”

- 174 9. *Specific Comment: Page 6, lines 5-9: Figure 2 shows the location of the MODIS fires,*  
175 *but the discussion is more about the shifts in the fires in the datasets. The text somehow*  
176 *implies Figure 2 illustrates those shifts, which it does not. Please change the text to*  
177 *clarify.*

178 **AUTHOR RESPONSE:** We chose poor colors for Figure 2. In the new figure, the  
179 difference between FINN and QFED gridded emissions is much clearer, especially due  
180 to the zoomed in map.

181 **Manuscript changes:** Replaced Figure 2.

- 182 10. *Specific Comment: Page 14, line 9:the use of “swept out” should be changed. Implies*  
183 *the winds pushed the aircraft over the ocean as opposed to a choice by the scientists or*  
184 *aircraft crew.*

185 **Manuscript changes:** p13, line 21: Modification; “ disembarked from Los Angeles,  
186 swept out over the ocean” changed to “embarked from Los Angeles, transited the  
187 off-shore Pacific inflow”

- 188 11. *Specific Comment: Page 14, lines 3-14: Suggest including the aircraft flight paths in*  
189 *Figure 2 to illustrate the discussion in this paragraph.*

190 **AUTHOR RESPONSE:** The flightpath is added.

191 **Manuscript changes:** Replaced Figure 2.

- 192 12. *Specific Comment: Page 14, line 18: Do you mean “Average” or “re-average”? They*  
193 *mention the 10-s data in the previous sentence, so perhaps that is a 10-s average? If*  
194 *that is the case, the text does not say so. The 90-s averaging is acknowledging the*  
195 *mismatch between the observations and the temporal resolution of the model. What*  
196 *I found missing was a discussion on the mismatch in spatial resolution, or does that*  
197 *even matter in the adjoint technique used? The model grid cell is 18 km, so it cannot*  
198 *resolve small-scale variation, so shouldn't the data be averaged to 18 km intervals?*

199 **AUTHOR RESPONSE:** We intended to say “re-average”. That procedure is de-  
200 scribed in Section 5.1.2 of Guerrette and Henze (2015): “The 10 s resolution ARCTAS  
201 observations of BC concentration, pressure, latitude, and longitude are averaged to  
202 the 90 s model time step, which is approximately the time the DC-8 would take to

203 traverse a single  $18 \text{ km} \times 18 \text{ km}$  column. However, the 10 s resolution ARCTAS BC  
204 concentrations are revision 2 (R2), while a later revision 3 (R3) product was released  
205 at 60 s resolution only. The later revision includes additional mass in the 50-900 nm  
206 size range as a result of applying a lognormal fit. In order to utilize this improved  
207 product, as well as leverage the finer resolution observations, the 10s BC mass is scaled  
208 by the mass ratio between the 60 s R3 and the 60 s average R2 data sets. The scaled  
209 90 s average observations are compared directly with the nearest model grid cell so  
210 that the model values are not interpolated.”

211 The temporal (not spatial) averaging and nearest-neighbor approaches introduce some  
212 mismatch between the observation and adjoint forcing locations. Spatial interpolation  
213 would reduce that error somewhat. We have not tested the impact on the posterior,  
214 but at least the adjoint spatial dispersion should enforce some correction.

- 215 13. *Specific Comment: Page 15, line 18: The authors mention that their adjoint technique*  
216 *requires 600 more computational time than a single simulation. It is good that this*  
217 *is mentioned. What is not included how many man-months or man-years such an*  
218 *effort requires (and that does not need to be included). But I would like to see some*  
219 *discussion at the end of the paper to weigh in on the advantages and disadvantages of*  
220 *the additional computation cost. In other words, is it worth the effort?*

221 **AUTHOR RESPONSE:** An objective answer to this question would require an  
222 extensive meta analysis of the benefits and costs of adjoint-based 4D-Var compared to  
223 other approaches, and would need to examine the valuation of labor versus hardware .  
224 But hopefully the results of this work could contribute to such a study someday. Also,  
225 for clarification we note that a single adjoint simulation in WRFPLUS-Chem requires a  
226 wall-time that is approximately 7 times that of a single forward model simulation, not  
227 600 times. It is the optimization (4D-Var) that requires most of the extra resources.

- 228 14. *Specific Comment: Page 15, lines 22-26: In this section of the details of the adjoint*  
229 *technique, I found it difficult to understand why it is important to show the convergence*  
230 *properties. I found the answer a few lines down on line 26. This rationale is a bit*  
231 *buried. I found the other sections had similar problems in terms of why it was important*  
232 *to visit aspects of the adjoint technique. This is a reflection that the authors assume the*  
233 *audience has a detailed knowledge of data assimilation and the adjoint technique in*  
234 *particular. So I think the concepts could be better communicated to a larger audience.*

235 **AUTHOR RESPONSE:** This paragraph and the following one have been reor-  
236 ganized for clarity and accuracy. In particular, the topic sentence for the following  
237 paragraph was previously misleading for the text within. There was also a sentence  
238 about model uncertainty being higher in locations with higher prior concentrations.  
239 While that is true on average, it is not the dominant error behavior corresponding to  
240 8:00 LT and 8:30 LT on 22 June, where the difference in observation uncertainty is  
241 more evident due to the difference in observed concentration.

242 **Manuscript changes:** See p15, lines 2-23.

- 243 15. *Specific Comment: Page 16, line 12: In relation to “overprediction seems to be less of*  
244 *a problem” to me is a result of the coarse grid spacing. Using  $dx = 18 \text{ km}$ , the model*

245 *should underpredict the peak concentrations of the emissions are correct. Only when*  
246 *the grid spacing is finer will the model resolve details of the smoke plume and there will*  
247 *be periods in which the concentrations could be higher than observed.*

248 **AUTHOR RESPONSE:** While originally we thought that the observation smooth-  
249 ing should be enough to counteract this resolution problem, we now realize a mistake  
250 in that logic. We modify the text as described below.

251 **Manuscript changes:** We removed that sentence and added the following paragraph  
252 (p16, lines 1-9): “For the appreciable measured BC concentrations ( $> 0.25 \mu\text{g m}^{-3}$ ),  
253 that are likely caused by a source within the model domain and simulation period,  
254 the lack of a source-receptor relationship is likely caused by low resolution. Changing  
255 a point source to a grid-scale area source changes its effective location. Temporal  
256 averaging of the observations will not necessarily solve that problem since perfectly  
257 modeled transport could still send a mis-located source in an entirely different direction  
258 than the truthfully located source. This effect is evident for valley fires (Strand et al.,  
259 2012), since placing the sources in the basin or spreading them throughout the basin  
260 and the peaks will result in different “downwind” concentrations. Downwind might  
261 be a very different direction if the convective scale winds contribute more information  
262 than the mesoscale winds to the true source-receptor relationship. Since the emissions  
263 are smoothed in the model and not in reality, the mis-location is more likely to cause  
264 under-prediction than over-prediction.”

265 The coarse resolution offsets the location of the sources relative to the fire detections  
266 (Figure 2), and this would prevent the true sparse BB point sources from aligning  
267 with the model-observation residual error. However, the observed intensity of the true  
268 smoke plume is muted by the temporal averaging. The posterior model concentrations  
269 in Fig. 4 (top) mimic the temporal resolution of those observations. Thus, the model  
270 could achieve the same intensity as the observations with correct emission magnitudes  
271 and locations.

- 272 16. *Specific Comment: Page 16, line 35: A 3.8 factor of uncertainty is used for the emis-*  
273 *sions. Did the authors try using values larger than 3.8?*

274 **AUTHOR RESPONSE:** That value was not arbitrary (see p14, lines 17-23). We  
275 tried values up to a factor of 10 for biomass burning sources in FINN\_STD and  
276 QFD\_STD, but larger uncertainties tended to raise the value of the final cost func-  
277 tion. Since FINN V1.5 is an outlier in this location and at several others, it warrants  
278 a larger uncertainty.

- 279 17. *Specific Comment: Page 18, lines 3-11: The increases in BC emissions in the Fresno*  
280 *area are remarkable, so that it seems to have higher emissions than the LA area (at*  
281 *least from the scale in the figure). The explanation for missing BC emission seems*  
282 *plausible, but would missing railroad emission produce values as high as the entire LA*  
283 *basin? Does this seem realistic?*

284 **AUTHOR RESPONSE:** To make this statement less definitive, we have made the  
285 following modifications.

286 **Manuscript changes:** (1) p17, line 35 to p18, line 2: Modification; “it could be  
287 speculated that the prior is missing diesel rail sources of BC. Another possibility...”  
288 changed to “the inversion results may suggest that the prior is missing diesel rail sources  
289 of BC. However, for locations where the prior magnitude of BB and anthropogenic  
290 emissions are of similar magnitude, their posteriors are subject to projection from one  
291 sector to another. It is more likely ...”

- 292 18. *Specific Comment: Page 21, lines 17-18: Isn't the first phrase in this sentence an*  
293 *obvious one that does not require this study to point out?*

294 **AUTHOR RESPONSE:** What we found important to point out is that alterna-  
295 tive observing strategies are required to characterize emissions. This is not surprising  
296 since IMPROVE was designed specifically to characterize background concentrations.  
297 Showing that this tool can at least tease out that basic observing strategy is the first  
298 step toward using such methods to plan more elaborate ones.

299 **Manuscript changes:** p21, lines 17-19: Modification; “The sparse  $\rho$  map for SURF  
300 in Fig. 13, and the large spike near Fresno illustrate that while near-source surface  
301 measurements can be a powerful constraint, measurements of background concentra-  
302 tions provide relatively little constraints on characterizing CA anthropogenic emissions  
303 on 1-day time scales.”

- 304 19. *Specific Comment: Page 22, lines 9-15: I am not sure what to make with the conclusion*  
305 *in the last sentence. It is true that in the cases examined in this study the aircraft flight*  
306 *paths and surface data might be saying different things about sources (since they are*  
307 *likely decoupled from one another). On other days that might not be the case when the*  
308 *aircraft flies in the boundary layer and will be more similar to h surface measurements.*  
309 *The concluding sentence seems to contract the whole notion of using ARCTAS-CARB*  
310 *for their test of the adjoint technique. However, a large fraction of fires, as well as*  
311 *field campaign data to characterize fires are conducted over forest regions that are often*  
312 *located in areas of complex terrain. It seems to be a problem one has to confront.*

313 **AUTHOR RESPONSE:** We have revised and shortened this paragraph, removing  
314 several sentences. Cross validation is a potentially useful inversion verification tech-  
315 nique. While it did not turn out to be very valuable in this particular case, that alone  
316 doesn't negate the value of the 4D-Var inversion, which we diagnosed using other means  
317 (posterior uncertainty estimates, DOF, etc.).

318 **Manuscript changes:** p22, lines 8-10: “Aircraft and surface observations do not  
319 appear to be useful for cross-validation of each other over the short timescales and  
320 limited set of flights considered here. At least for this study period, when they are not  
321 collocated, each provides some unique information to the inversion.”

- 322 20. *Specific Comment: Page 22: line 27: The authors state upfront and here that the paper*  
323 *focused on emissions only and not other factors that can affect BC concentrations. In*  
324 *the future, will they extend the analysis to meteorology to reduce those factors as well?*

325 **AUTHOR RESPONSE:** For the results of any inversion to be meaningful, one has to  
326 consider the uncertainty introduced by imperfect meteorology. While we attempted to

327 do this by introducing an ensemble-based model variance in  $\mathbf{R}$ , that approach leaves  
328 errors in subgrid vertical mixing that can not be corrected. A more robust (and  
329 expensive) solution is to use an ensemble of data assimilations (EDA) and simultaneous  
330 DA for meteorological and chemical variables. That would be one logical next step for  
331 this work.

- 332 21. *Specific Comment: Conclusion: There are a few points I find missing or poorly artic-*  
333 *ulated. The first is related to recommendation on future sampling. Here and there in*  
334 *the paper the authors mention or allude to changes in the sapling strategy that would*  
335 *help in better constraining the emission. (1) It would be useful to include a summary*  
336 *of  $X$ ,  $Y$ , and  $Z$  they feel would be useful. (2) Second, how many more cases would be*  
337 *needed to have more robust estimates of the emissions? (3) Finally, another discussion*  
338 *I mentioned in an early comment, is the computational cost and effort of using an*  
339 *adjoint technique worth the cost? One could take an alternative approach is to simply*  
340 *perform a small number of sensitivity simulation that scale the emissions to get a better*  
341 *fit. This is of contrast to a brute force method, which is not as mathematically pleasing*  
342 *as the adjoint.*

343 **AUTHOR RESPONSE:** (1) We have revised the manuscript as described below.

344 **Manuscript changes:** p19, line 4: Removal; “Further decreasing uncertainty would  
345 require observing the same phenomena more thoroughly, either for longer periods, with  
346 greater spatial coverage, or with more instruments.”

347 p19, lines 24-27: Addition; “That strategy is consistent with what is generally known:  
348 further decreasing uncertainty requires observing the same phenomena more thor-  
349 oughly. For hourly to daily time scales, more observations are needed close to and  
350 downwind of chemical sources, and at high spatial and temporal resolution (e.g., from  
351 repeated aircraft overpasses, extra aircraft, hourly-average surface sites, satellites).”

352 Also, we again revisit the topic of the types of observations that would be most useful  
353 in the Conclusions:

354 “...high spatial and/or temporal resolution concentration measurements from research  
355 campaigns or geostationary satellites are necessary to provide the sufficient constraints  
356 on inventory errors.”

357 (2) 4D-Var does not provide this information – for that we would need the adjoint of  
358 the adjoint, and of the optimization routine itself. Clearly this goes beyond the scope  
359 of the present work.

360 (3) When comparing the computational and development costs of a Bayesian top-down  
361 method (e.g., adjoint-based 4D-Var, EnKF, or LPDM) to an ad-hoc scaling, one must  
362 consider the differences in the types of solutions that these methods provide. Indeed,  
363 a “small number of sensitivity simulations” can be used to derive low-dimension re-  
364 scalings of the emissions, as we demonstrated in Section 2.2. In contrast, a high  
365 resolution Bayesian posterior has much more spatial-temporal information than can  
366 be provided by a sensitivity study. Further, a Bayesian inversion’s goal goes beyond  
367 getting “a better fit”, which runs the risk of overfitting data that contains noise with-  
368 out regards for prior information or model errors; additionally, Bayesian approaches

369 afford posterior diagnostics regarding the reduction in uncertainty and information  
370 content. This auxiliary information, not available from a simple emissions rescaling  
371 based on low-dimension sensitivity calculations, is useful for evaluating the value of  
372 the observations and the inversion result.

- 373 22. *Specific Comment: Figure 2: The colors used for the vegetation distribution make it*  
374 *difficult to see the red dots denoting the fires. It would be useful to include the aircraft*  
375 *flight paths.*

376 **AUTHOR RESPONSE:** We added the 22 June flight transect, and also added white  
377 outlines to the fires to differentiate them from the surrounding colors.

378 **Manuscript changes:** Replaced Figure 2.

- 379 23. *Specific Comment: Figure 7: Consider changing the color scale, it is very difficult to*  
380 *see changes from one figure to the next.*

381 **AUTHOR RESPONSE:** We smeared out the color scale on the low end to make  
382 the large outliers stick out. Since the variation in neighboring grid cells can be quite  
383 large, it is difficult to pick out single grid cells. Also, with the difference in re-gridding  
384 between QFED and FINN, comparison between the two inventories is tenuous at grid  
385 scale. The posterior-prior increments in Figure 8 and the EA totals in Table 5 serve  
386 as other means of comparison.

- 387 24. *Specific Comment: Figure 9: The caption denotes posterior BB, but it is not clear*  
388 *which lines in the figure are posterior based on the legend.*

389 **Manuscript changes:** Modified caption; “Hourly BB diurnal emission patterns for  
390 the four EAs and all inversion scenarios for 22 June, 00Z-23Z, with the time shown in  
391 LT. The priors are shown as black lines, while the posteriors from specific inversion  
392 scenarios are shown in color. Note that FINNv1.0 did not have any fires in EA4 on 21  
393 June.”

## 394 2 Responses to Anonymous Referee #3

- 395 1. *Specific Comment: One major concern of the MS is that the numerical experiments*  
396 *were only based on two real case forecasting. Since the atmospheric chemistry and*  
397 *meteorological conditions vary day to day. It is suggested that the authors extend the*  
398 *experiments.*

399 **AUTHOR RESPONSE:** Indeed the cross validation was meant to check whether  
400 the posterior scaling factors found on one day are consistent with observations on  
401 subsequent days. They were not. We conclude that an observing strategy that targets  
402 specific source regions for longer periods of time would be more beneficial than, e.g.,  
403 trying to cover the entire state of California in a single campaign. Much of this work  
404 was geared towards seeing what exactly this new tool can accomplish with a given set  
405 of observations. In future work it will be applied to many other observation sets.

- 406 2. *Specific Comment: How many numbers of the control variables in your CHEMDA*  
407 *system? Only BC? Please clarify the observation Operator and its adjoint. If the*  
408 *control variable ?same? as observation, the observation Operator and adjoint is simply*  
409 *as interpolation method. If not, you should clarify in the manuscript. In addition,*  
410 *how to deal with cross correlation between control variables (e.g. NO<sub>3</sub> is correlate with*  
411 *SO<sub>4</sub>) if the number of CV is more than two.*

412 **AUTHOR RESPONSE:** The observation operator includes temporal averaging and  
413 a conversion from  $\mu\text{g BC m}^{-3}$  in the observation to  $\mu\text{g BC (kgdryair)}^{-1}$  in the model.  
414 We describe those details and those of the model adjoint derivation in Guerrette and  
415 Henze (2015). Although BC is the only chemical species for which emissions are con-  
416 strained, the sources are distributed across the entire domain. There are many zero-  
417 emission grid cells for BB sources. In total there are 5080 grid cells with non-zero  
418 emissions (# biomass burning + # anthropogenic), each with a scaling factor every  
419 hour (size(CV) = 121,920 for 24 hours) — i.e., p14, line 35.

- 420 3. *Specific Comment: Incremental method is commonly used method in data assimila-*  
421 *tion. The manuscript appear “incremental” many times. I suggest delete redundant*  
422 *“incremental” in the manuscript.*

423 **AUTHOR RESPONSE:** While we agree that needless repetition of an established  
424 term ought to be avoided, in most cases we specifically refer to the incremental formu-  
425 lation to distinguish it from other approaches that previous authors have followed or  
426 to make note of particular advantages or disadvantages of this method. Here is a list  
427 of places where we feel this is the case:

- 428 • p3, line 25
- 429 • p4, line 14
- 430 • p5, line 15
- 431 • p7, line 3
- 432 • p7, line 6
- 433 • p8, lines 28 and 30
- 434 • p12, line 26
- 435 • p13, line 1
- 436 • p22, line 12

437 **Manuscript changes:** Removed “incremental” at p14, line 33. Removed “4D-Var”  
438 at p22, line 19.

- 439 4. *Specific Comment: Background error covariance (BEC) is important in data assimila-*  
440 *tion. The observation information spread to model grid cells via BEC. The authors*  
441 *mentioned chemical emissions heterogeneous. However, the construction of the “B” in*  
442 *the manuscript seems to be homogeneous?*

443 **AUTHOR RESPONSE:** Yes the chemical emissions are heterogenous. We use mul-  
444 tiplicative uncertainties through a log-normal background term to circumvent the need

445 to use heterogenous Gaussian distributed errors. We also discussed the possibility that  
446 the relative uncertainties are spatially heterogeneous. One might derive such heteroge-  
447 nous uncertainties using a Monte Carlo approach, but the details of such a procedure  
448 are far beyond the scope of this work.

### 449 **3 Additional changes**

- 450 1. We modified the Damped Gauss Newton section to remove needless details. Since  
451 writing the paper, we have added an optimal line search for the damping parameter,  
452 and the new results are nearly identical to those presented in this work. Thus we also  
453 eliminated the discussion of “Heuristic Damped Gauss Newton”.
- 454 2. Modification; the posterior covariance is changed from  $\mathbf{A}$  to  $\mathbf{P}^a$  throughout for consis-  
455 tency with previous literature.
- 456 3. We rearranged the second paragraph (p2, lines 7-13) to improve readability.
- 457 4. “heterogenous” is corrected to “heterogeneous” throughout
- 458 5. p4, line 8: Modification; “incremental 4D-Var in WRFDA-Chem” changed to “WRFDA”
- 459 6. p5, line 34 to p6, line 2: Modification; “For temperate forests QFED scales aerosols by  
460  $\times 4.5$  throughout the world. That vegetation category accounts for 80% of the wild-fire  
461 BC in California during 22-30 June 2008. The ...”
- 462 7. p6, lines 5-6: Addition; ”..., and without it FINNv1.0 and QFED would differ by  $\times 10$   
463 during the ARCTAS-CARB campaign.”
- 464 8. p14, line 19; p14, line 24; p16, line 21: Addition; “relative” as in “..we use a relative  
465 grid-scale BB uncertainty..”
- 466 9. p14, line 23: Addition; “(see Sec. 3.3)”
- 467 10. p16, line 27: Modification; changed “in” to “at” as in “Meanwhile, at other times...”
- 468 11. p17, line 24: Reference Correction; “Zhang et al., 2012” fixed to “Zhang et al., 2014a”
- 469 12. p18, line 15: Removal; “and ” as in “..., and additional inversions, ”
- 470 13. p21, line 23: Removal; “Even before carrying out such a test, ” as in “Even before  
471 carrying out such a test, the heterogeneous adjoint ...”
- 472 14. p22, line 4: Modification; “in any” changed to “derived from”
- 473 15. p22, line 27: Added reference to Song et al. (2016).
